- underestimates delirium rate after cardiac surgery. *Can J Anaesth* 2010; 57:898–902
12. Riker RR, Picard JT, Fraser GL: Prospective evaluation of the Sedation Agitation Scale for adult critically ill patients. *Crit Care Med* 1999; 27:1325–9
  13. Ely EW, Inouye SK, Bernard GR, Gordon S, Francis J, May L, Truman B, Speroff T, Gautam S, Margolin R, Hart RP, Dittus R: Delirium in mechanically ventilated patients: Validity and reliability of the confusion assessment method for the intensive care unit (CAM-ICU). *JAMA* 2001; 286:2703–10
  14. Thoma BN, Li J, McDaniel CM, Wordell CJ, Cavarocchi N, Pizzi LT: Clinical and economic impact of substituting dexmedetomidine for propofol due to a US drug shortage: Examination of coronary artery bypass graft patients at an urban medical centre. *Pharmacoeconomics* 2014; 32:149–57
  15. Pandharipande P, Ely EW, Maze M:  $\alpha$ -2 Agonists: Can they modify the outcomes in the postanesthesia care unit? *Curr Drug Targets* 2005; 6:749–54
  16. Alexopoulou C, Kondili E, Diamantaki E, Psarologakis C, Kokkini S, Bolaki M, Georgopoulos D: Effects of dexmedetomidine on sleep quality in critically ill patients: A pilot study. *ANESTHESIOLOGY* 2014; 121:801–7
  17. Nelson LE, Lu J, Guo T, Saper CB, Franks NP, Maze M: The  $\alpha$ 2-adrenoceptor agonist dexmedetomidine converges on an endogenous sleep-promoting pathway to exert its sedative effects. *ANESTHESIOLOGY* 2003; 98:428–36
  18. Herr DL, Sum-Ping ST, England M: ICU sedation after coronary artery bypass graft surgery: Dexmedetomidine-based versus propofol-based sedation regimens. *J Cardiothorac Vasc Anesth* 2003; 17:576–84
  19. Ueki M, Kawasaki T, Habe K, Hamada K, Kawasaki C, Sata T: The effects of dexmedetomidine on inflammatory mediators after cardiopulmonary bypass. *Anaesthesia* 2014; 69:693–700
  20. Ji F, Li Z, Nguyen H, Young N, Shi P, Fleming N, Liu H: Perioperative dexmedetomidine improves outcomes of cardiac surgery. *Circulation* 2013; 127:1576–84

## ANESTHESIOLOGY REFLECTIONS FROM THE WOOD LIBRARY-MUSEUM

### Sim and Bause Flanking Stoeckel, “Germany’s Paul Wood”

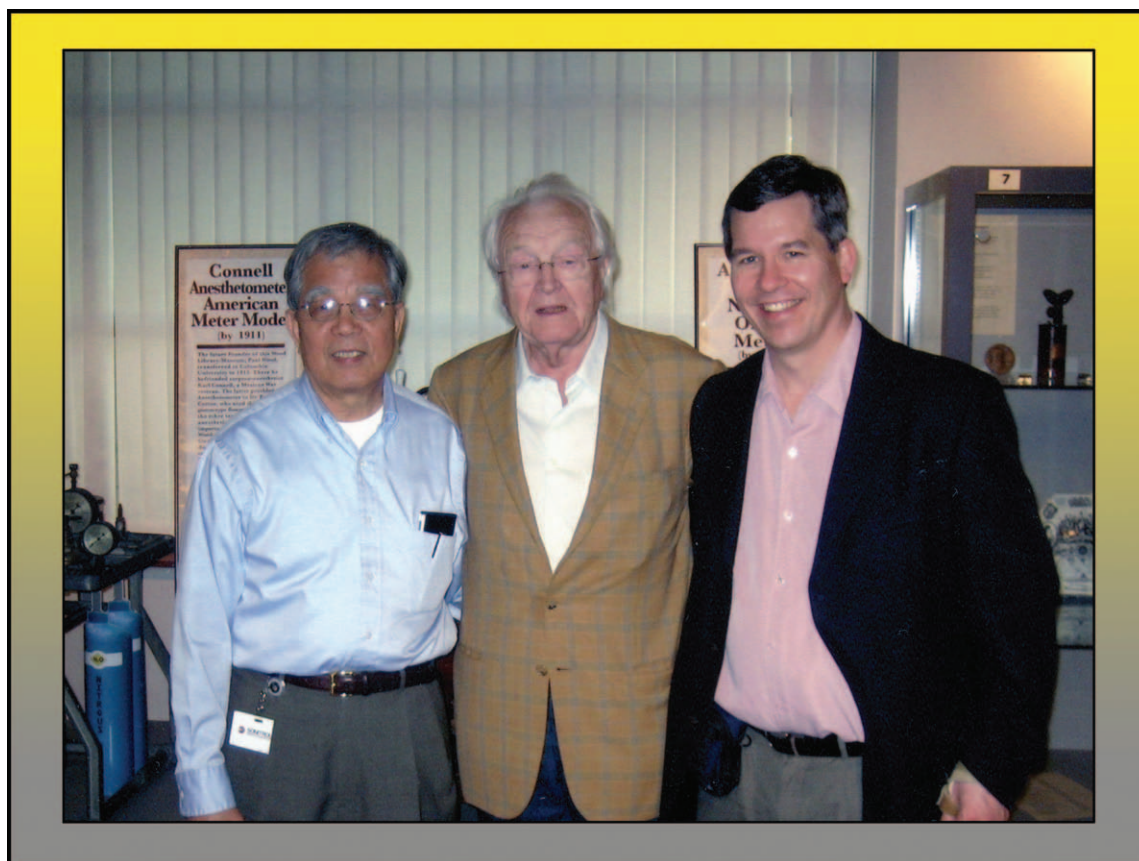

Now in Schaumburg, Illinois, the Wood Library-Museum of Anesthesiology was founded formally in 1933 in New York by Paul Meyer Wood, M.D. (1894 to 1963). The late Paul M. Wood Distinguished Librarian Emeritus, Patrick Sim, M.L.S. (1939 to 2010; *left*), enjoyed referring to Prof. Dr. Dr. Horst Stoeckel (*center*) as “Germany’s Paul Wood.” Soon after this trio was photographed in 2008 at the WLM’s former Park Ridge Gallery, Prof. Stoeckel reminded the author (*right*) that the Stoeckel surname meant “little stick” in German. So the WLM’s Sim and Bause spent the rest of the day musing about the “little stick in the Wood” (Library-Museum). Prof. Stoeckel may have had the last laugh, however, as he now curates one of the world’s finest anesthesia museums. His namesake library and museum complex opened in 2000 in Venusberg, a southern suburb of Bonn, Germany. (Copyright © the American Society of Anesthesiologists, Inc.)

George S. Bause, M.D., M.P.H., Honorary Curator, ASA’s Wood Library-Museum of Anesthesiology, Schaumburg, Illinois, and Clinical Associate Professor, Case Western Reserve University, Cleveland, Ohio. UJYC@aol.com.
